# Supplementary material for: Surgical Treatment of Postinfarction Ventricular Septal Rupture
Source: PubMed Central journal article supplement (PMC8529403; doi:10.1001/jamanetworkopen.2021.28309), 2021-10-20
Supplement: jamanetwopen-e2128309-s001.pdf [file jamanetwopen-e2128309-s001.pdf]

## Supplemental Online Content

Ronco D, Matteucci M, Kowalewski M, et al. Surgical treatment of postinfarction ventricular septal rupture. *JAMA Netw Open*. 2021;4(10):e2128309.  
doi:10.1001/jamanetworkopen.2021.28309

**eFigure.** Temporal Trends of In-Hospital Mortality, 2001 to 2019

This supplemental material has been provided by the authors to give readers additional information about their work.

**eFigure. Temporal Trends of In-Hospital Mortality, 2001 to 2019**

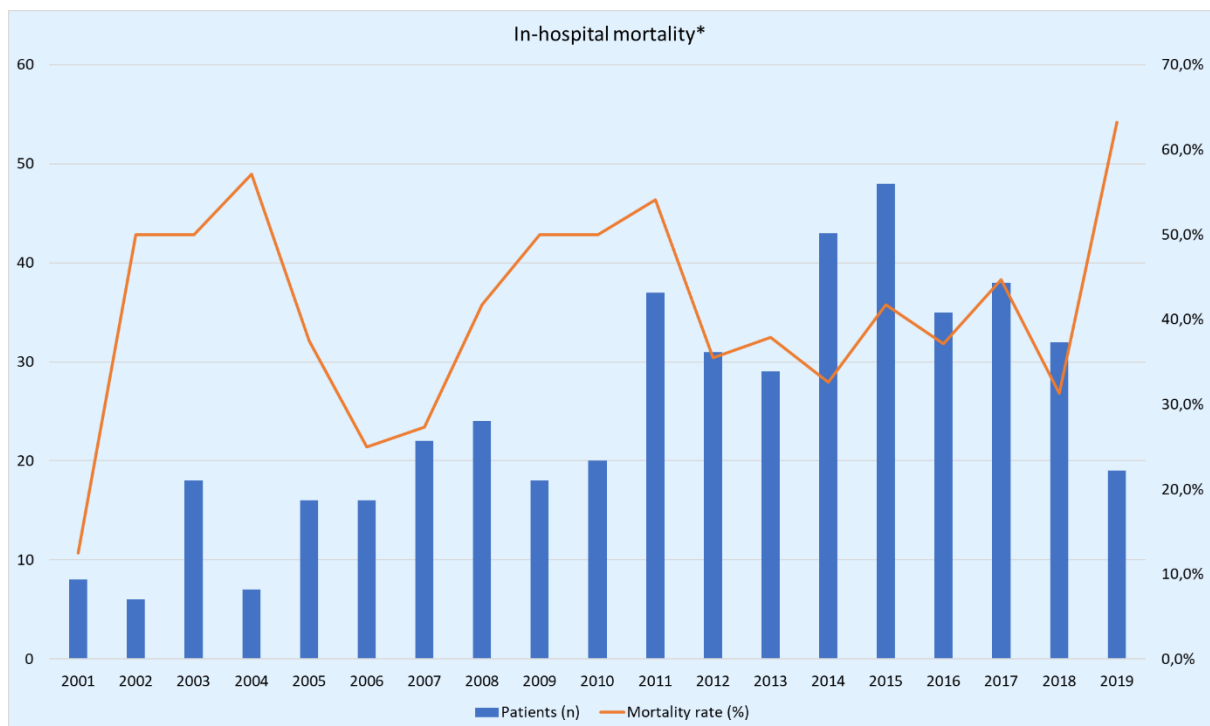

\*Year of surgery available in 467 patients (98.3%).
